# Supplementary material for: Discipline in Stages: Regulating CD8+ Resident Memory T Cells
Source: PubMed Central journal article supplement (PMC8017121; doi:10.3389/fimmu.2020.624199), 2021-03-19
Supplement: Table_1.pdf [file Table_1.pdf]

**Supplementary Table 1.** Stage 1: Priming and CD8<sup>+</sup> T<sub>RM</sub> precursor formation.

| Stage1: Priming and precursor development |                   |         | Tissue | Model                          | References |
|-------------------------------------------|-------------------|---------|--------|--------------------------------|------------|
| TCR Affinity                              | Low               |         | Lung   | Influenza                      | (50)       |
|                                           |                   |         | Brain  | Polyomavirus                   | (48)       |
|                                           | High              |         | Brain  | Polyomavirus                   | (49)       |
| Antigen presentation                      | DCs cross-priming |         | Skin   | VV                             | (60)       |
|                                           |                   |         | Lung   | VV                             | (60)       |
|                                           |                   |         |        | Humanized tumor model          | (61)       |
| Route of infection                        | Dependent         | Oral    | SI IEL | LM                             | (42)       |
| Cytokines                                 | IL-12             | Inhibit | Spleen | LCMV, LM                       | (69)       |
|                                           | IL-10             | Induce  | Lung   | a-CD40ab-PolyIC-HIVenvpeptides | (70)       |

Table abbreviations: LM: listeria monocytogenes; LCMV: lymphocytic choriomeningitis virus; VV: vaccinia virus; SI: Small intestine; IEL: Intraepithelial lymphocytes.
