# Supplementary material for: Discipline in Stages: Regulating CD8+ Resident Memory T Cells
Source: PubMed Central journal article supplement (PMC8017121; doi:10.3389/fimmu.2020.624199), 2021-03-19
Supplement: Table_2.pdf [file Table_2.pdf]

**Supplementary Table 2. Stage 2: CD8<sup>+</sup> T<sub>RM</sub> formation in peripheral tissues.**

| Stage 2: Formation in the tissue |       |       | Tissue                    | Model                | References |
|----------------------------------|-------|-------|---------------------------|----------------------|------------|
| TRM markers                      | CD69  | +     | SI IEL, LN                | LCMV                 | (71,75)    |
|                                  |       |       | Skin                      | HSV                  | (41,74,82) |
|                                  |       |       | Lung, intestine           | Healthy human tissue | (73)       |
|                                  |       |       | Kidney                    | LCMV, influenza      | (78)       |
|                                  |       | -     | SI IEL, lung, FRT         | LCMV, influenza, VSV | (78)       |
|                                  | CD103 | +     | SI IEL                    | LCMV                 | (71)       |
|                                  |       |       | Skin                      | HSV                  | (4,41)     |
|                                  |       |       | FRT                       | HSV                  | (79)       |
|                                  |       |       | Liver                     | LCMV                 | (82)       |
|                                  |       |       | Lung                      | Influenza            | (80,154)   |
|                                  |       | Human |                           | (72)                 |            |
|                                  |       | -     | Intestinal LP             | LM                   | (42)       |
|                                  |       |       |                           | Yptb                 | (81)       |
|                                  | Liver |       | LCMV                      | (82)                 |            |
|                                  | CD49a | +     | Lung                      | Healthy human tissue | (73)       |
|                                  |       |       |                           | Influenza            | (7,154)    |
|                                  |       |       | Intestine                 | Healthy human tissue | (73)       |
| Skin                             |       |       | Human vitiligo, psoriasis | (24)                 |            |
|                                  |       |       | HSV                       | (4,82,83)            |            |

|                            |        |           |                                |           |         |
|----------------------------|--------|-----------|--------------------------------|-----------|---------|
|                            | S1p1   | ↓         | Skin                           | HSV       | (41,74) |
|                            |        |           | Intestine                      | LCMV      | (43)    |
| Transcriptional regulators | KLF2↓  |           | Intestine                      | LCMV      | (43,77) |
|                            |        |           | SG, kidney, brain,             | LCMV      | (77)    |
|                            | Hobit↑ |           | Skin                           | HSV       | (82)    |
|                            |        |           | Liver, intestine, kidney       | LCMV      | (82)    |
|                            | Blimp↑ |           | Skin                           | HSV       | (82)    |
|                            |        |           | Intestine, liver, kidney, lung | LCMV      | (82,88) |
|                            |        |           | Intestinal IEL                 | LCMV      | (90)    |
|                            | NR4A1↑ |           | Liver, Lung, intestine         | LCMV      | (43,97) |
|                            | NR4A2↑ |           | Intestine                      | LCMV      | (90)    |
|                            | Junb↑  |           | Intestine                      | LCMV      | (43)    |
|                            | Eomes↓ |           | Brain                          | LM        | (92)    |
|                            |        |           | Skin                           | HSV       | (93)    |
|                            | T-bet↓ |           | Skin                           | HSV       | (93)    |
|                            |        |           | Lung                           | Influenza | (94)    |
|                            | Runx3↑ |           | Intestine                      | LCMV      | (43)    |
|                            |        |           | Skin                           | HSV       | (32)    |
|                            |        | Intestine | LCMV, LM                       | (90)      |         |
|                            |        | Lung      | Human                          | (72)      |         |

|                  |                        |                |               |           |              |
|------------------|------------------------|----------------|---------------|-----------|--------------|
| Antigen          | Dependent              |                | Brain         | VSV, LM   | (9)          |
|                  |                        |                | Lung          | Influenza | (99–102,160) |
|                  | Independent            |                | Skin          | DNFB-HSV  | (103)        |
|                  |                        |                |               | MVA       | (106)        |
|                  |                        |                |               | VV        | (107)        |
| Intestinal IEL   | LCMV                   | (104)          |               |           |              |
| Tissue migration | CXCR3-<br>CXCL9/CXCL10 |                | Skin          | HSV       | (41)         |
|                  |                        |                | Intestinal LP | Yptb      | (115)        |
|                  |                        |                | Intestine     | LM        | (125)        |
|                  |                        |                | FRT           | HSV       | (105)        |
|                  | CCR9                   | Intestinal IEL | LCMV          | (5,43)    |              |
|                  | CCR8                   | Skin           | Human         | (117,118) |              |
|                  | CCR10-CCL27            | Skin           | HSV           | (116)     |              |
|                  | CXCR6                  | Skin           | DNFB          | (116)     |              |
| Cytokines        | TGF- $\beta$           |                | Intestine     | LCMV      | (104,108)    |
|                  |                        |                | Skin          | HSV       | (41)         |
|                  |                        |                | Kidney        | LCMV      | (109)        |
|                  |                        |                | Lung          | Influenza | (94)         |
|                  |                        |                |               | LCMV      | (110)        |
|                  | IL-12                  | Intestinal LP  | Yptb          | (81)      |              |
|                  | IFN- $\beta$           | Intestinal LP  | Yptb          | (81)      |              |
| Immune cells     | CD4 <sup>+</sup>       | Induce         | Lung          | Influenza | (94)         |

|                  |                           |         |                |           |       |
|------------------|---------------------------|---------|----------------|-----------|-------|
|                  |                           |         | Intestinal LP  | Yptb      | (115) |
|                  | NK1.1 <sup>+</sup><br>ILC | Inhibit | Salivary gland | LCMV      | (119) |
| Immune mediators | 4-1BB-4-1BBL              |         | Lung           | Influenza | (120) |
|                  | GITRL                     |         | Lung           | Influenza | (121) |
|                  | miR-155                   |         | Brain          | LM        | (123) |
|                  | ATP/ P2RX7                |         | Intestine      | LCMV      | (169) |

Table abbreviations: + Expressed; - Not expressed; ↑ upregulated; ↓ downregulated; DNFB: 2,4-Dinitro-1-fluorobenzene; MVA: poxvirus modified Vaccinia Ankara; LM: listeria monocytogenes; LCMV: lymphocytic choriomeningitis virus; HSV: herpes simplex virus; VSV: vesicular stomatitis virus; VV: vaccinia virus; Yptb: Yersinia pseudotuberculosis; SI: Small intestine; LP: Lamina propria; IEL: Intraepithelial lymphocytes; FRT: Female reproductive tract; GITRL: glucocorticoid-induced TNFR-related protein ligand; miR: microRNAs.
