# Supplementary material for: Discipline in Stages: Regulating CD8+ Resident Memory T Cells
Source: PubMed Central journal article supplement (PMC8017121; doi:10.3389/fimmu.2020.624199), 2021-03-19
Supplement: Table_3.pdf [file Table_3.pdf]

**Supplementary Table 3. Stage 3: CD8<sup>+</sup> T<sub>RM</sub> maintenance in peripheral tissues.**

| Stage 3: Maintenance in the tissue |                  |             | Tissue                | Model           | References |
|------------------------------------|------------------|-------------|-----------------------|-----------------|------------|
| TRM markers                        | CD69             | Independent | Lung                  | Influenza       | (99)       |
| Antigen                            | Independent      |             | Intestinal IEL        | LCMV            | (104)      |
|                                    |                  |             | Skin                  | CPXV            | (126)      |
|                                    |                  |             |                       | DNFB-HSV        | (103)      |
|                                    |                  |             | Lung                  | Influenza       | (99,132)   |
|                                    | Dependent        | Lung        | Influenza             | (128)           |            |
| Cytokines                          | IL-15            | Survival    | Skin                  | HSV             | (93)       |
|                                    | TGF- $\beta$     | Retention   | Intestine             | LCMV            | (108)      |
|                                    |                  |             | Skin                  | HSV             | (93)       |
|                                    |                  |             | Intestinal LP         | Yptb            | (81)       |
|                                    | IL-12            | Survival    | Intestinal LP         | Yptb            | (81)       |
| Transcriptional regulators         | Id3 $\uparrow$   |             | Intestinal IEL        | LCMV            | (90)       |
|                                    | Ahr $\uparrow$   |             | Skin                  | HSV - DNFB      | (133)      |
|                                    |                  |             | Intestine             | LCMV            | (43)       |
|                                    |                  |             | Lung                  | Human           | (72)       |
|                                    | Notch $\uparrow$ |             | Lung                  | Human/Influenza | (72)       |
| Immune mediators                   | NAD/P2RX7        | Depletion   | Intestinal IEL, liver | LCMV            | (139)      |
|                                    | IFITM3           | Survival    | Lung                  | Influenza       | (140)      |
| Metabolism                         | FABP4/ FABP5     |             | Skin                  | VV              | (141)      |

|  |                   |                |                 |       |
|--|-------------------|----------------|-----------------|-------|
|  |                   |                | HSV             | (142) |
|  | FABP1/FABP4       | Liver          | LCMV            | (142) |
|  | FABP1/FABP2/FABP6 | Intestinal IEL | LCMV            | (142) |
|  | BTLA, SPRY1, A2AR | Lung           | Human/Influenza | (72)  |
|  | <i>Tigit</i>      | Intestinal IEL | LCMV            | (43)  |

Table abbreviations: ↑ upregulated; DNFB: 2,4-Dinitro-1-fluorobenzene; LCMV: lymphocytic choriomeningitis virus; HSV: herpes simplex virus; VV: vaccinia virus; Yptb: Yersinia pseudotuberculosis; CPXV: cowpox virus; LP: Lamina propria; IEL: Intraepithelial lymphocytes
