# Supplementary material for: Discipline in Stages: Regulating CD8+ Resident Memory T Cells
Source: PubMed Central journal article supplement (PMC8017121; doi:10.3389/fimmu.2020.624199), 2021-03-19
Supplement: Table_4.pdf [file Table_4.pdf]

**Supplementary Table 4. Stage 4: Pathogen challenge**

| Stage 4: Pathogen challenge |               |                                             | Tissue         | Model                | References |
|-----------------------------|---------------|---------------------------------------------|----------------|----------------------|------------|
| Transcriptional regulators  | Notch↑        | IFN- $\gamma$                               | Lung           | Human/Influenza      | (72)       |
|                             | Hobit↑        | Granzyme B                                  | Liver          | LCMV                 | (158)      |
|                             | Bhlhe↑        | Metabolism,<br>IFN- $\gamma$ ,<br>GzmB, TNF | Lung           | Influenza            | (164)      |
|                             |               |                                             | Intestinal IEL | LCMV                 | (43)       |
| Immune effector molecules   | IFN- $\gamma$ |                                             | Lung           | Human/Influenza      | (72)       |
|                             |               |                                             |                | Influenza            | (156)      |
|                             |               |                                             |                | Healthy human tissue | (73)       |
|                             |               |                                             | Skin           | HSV                  | (82,83)    |
|                             |               |                                             |                | Human                | (24)       |
|                             |               |                                             | Lung           | LM                   | (92)       |
|                             | LCMV          | (155)                                       |                |                      |            |
|                             | TNF- $\alpha$ |                                             | Lung           | Human/Influenza      | (72)       |
|                             | IL-2          |                                             | Lung           | Human/Influenza      | (72)       |
|                             |               |                                             |                | Healthy human tissue | (73)       |
|                             |               |                                             | Liver          | Human                | (157)      |
|                             | Granzyme B    |                                             | Intestinal IEL | LCMV                 | (71)       |
|                             |               |                                             | Liver          | LCMV                 | (158)      |
|                             |               |                                             | Brain          | LCMV                 | (155)      |
|                             |               |                                             | Skin           | Human                | (24)       |
| CD49a                       |               | Skin                                        | HSV            | (24,83)              |            |

|                   |                   |                |                 |       |
|-------------------|-------------------|----------------|-----------------|-------|
| Immune inhibitors | PD-1              | Lung           | Human/Influenza | (72)  |
|                   |                   |                | Influenza       | (128) |
|                   | CD101             | Intestinal IEL | LCMV            | (43)  |
|                   | CTLA4             | Lung           | Human/Influenza | (72)  |
|                   |                   | Intestinal IEL | LCMV            | (43)  |
|                   | LAG3              | Lung           | Human/Influenza | (72)  |
|                   |                   | Intestinal IEL | LCMV            | (43)  |
|                   | BTLA, SPRY1, A2AR | Lung           | Human/Influenza | (72)  |
| <i>Tigit</i>      | Intestinal IEL    | LCMV           | (43)            |       |

Table abbreviations: ↑ upregulated; LM: listeria monocytogenes; LCMV: lymphocytic choriomeningitis virus; HSV: herpes simplex virus; CPXV: cowpox virus; IEL: Intraepithelial lymphocytes; GzmB: Granzyme B
